# Supplementary material
Source: Elsevier journal article supplement (https://www.sciencedirect.com/science/article/pii/S0213911111003098)
Supplement: mmc2 [file S0213911111003098:mmc2.pdf]

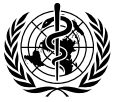

# WHODAS 2.0

WORLD HEALTH ORGANIZATION  
DISABILITY ASSESSMENT SCHEDULE 2.0

## 36-item version, proxy-administered

This questionnaire asks about difficulties due to health conditions experienced by the person about whom you are responding in your role as friend, relative or carer. Health conditions include diseases or illnesses, other health problems that may be short or long lasting, injuries, mental or emotional problems, and problems with alcohol or drugs.

Think back over the past 30 days and, to the best of your knowledge, answer these questions thinking about how much difficulty your friend, relative or carer had while doing the following activities. (Note: the questionnaire uses the term “relative” to mean “friend”, “relative” or “carer”.) For each question, please circle only one response.

|                 |                                             |     |                   |     |                          |
|-----------------|---------------------------------------------|-----|-------------------|-----|--------------------------|
| H4 <sup>a</sup> | I am the _____ (choose one) of this person. | 1 = | husband or wife   | 5 = | other relative           |
|                 |                                             | 2 = | parent            | 6 = | friend                   |
|                 |                                             | 3 = | son or daughter   | 7 = | professional carer       |
|                 |                                             | 4 = | brother or sister | 8 = | other (specify)<br>_____ |

<sup>a</sup> Questions H1–H3 appear at the end of the questionnaire.

***Please continue to next page ...***

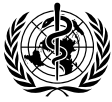

# WHODAS 2.0

WORLD HEALTH ORGANIZATION  
DISABILITY ASSESSMENT SCHEDULE 2.0

36

Proxy

| In the past 30 days, <u>how much difficulty</u> did your relative have in: |                                                                               |      |      |          |        |                      |
|----------------------------------------------------------------------------|-------------------------------------------------------------------------------|------|------|----------|--------|----------------------|
| <b>Understanding and communicating</b>                                     |                                                                               |      |      |          |        |                      |
| D1.1                                                                       | <u>Concentrating on doing something for ten minutes?</u>                      | None | Mild | Moderate | Severe | Extreme or cannot do |
| D1.2                                                                       | <u>Remembering to do important things?</u>                                    | None | Mild | Moderate | Severe | Extreme or cannot do |
| D1.3                                                                       | <u>Analysing and finding solutions to problems in day-to-day life?</u>        | None | Mild | Moderate | Severe | Extreme or cannot do |
| D1.4                                                                       | <u>Learning a new task</u> , for example, learning how to get to a new place? | None | Mild | Moderate | Severe | Extreme or cannot do |
| D1.5                                                                       | <u>Generally understanding</u> what people say?                               | None | Mild | Moderate | Severe | Extreme or cannot do |
| D1.6                                                                       | <u>Starting and maintaining a conversation?</u>                               | None | Mild | Moderate | Severe | Extreme or cannot do |
| <b>Getting around</b>                                                      |                                                                               |      |      |          |        |                      |
| D2.1                                                                       | <u>Standing for long periods</u> such as 30 minutes?                          | None | Mild | Moderate | Severe | Extreme or cannot do |
| D2.2                                                                       | <u>Standing up</u> from sitting down?                                         | None | Mild | Moderate | Severe | Extreme or cannot do |
| D2.3                                                                       | <u>Moving around inside their home?</u>                                       | None | Mild | Moderate | Severe | Extreme or cannot do |
| D2.4                                                                       | <u>Getting out of their home?</u>                                             | None | Mild | Moderate | Severe | Extreme or cannot do |
| D2.5                                                                       | <u>Walking a long distance</u> such as a kilometre [or equivalent]?           | None | Mild | Moderate | Severe | Extreme or cannot do |

***Please continue to next page ...***

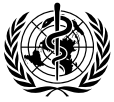

# WHODAS 2.0

WORLD HEALTH ORGANIZATION  
DISABILITY ASSESSMENT SCHEDULE 2.0

36

Proxy

| Because of their health condition, in the past 30 days, <u>how much difficulty</u> did your relative have in: |                                                                      |      |      |          |        |                      |
|---------------------------------------------------------------------------------------------------------------|----------------------------------------------------------------------|------|------|----------|--------|----------------------|
| <b>Self-care</b>                                                                                              |                                                                      |      |      |          |        |                      |
| D3.1                                                                                                          | Washing his or her <u>whole body</u> ?                               | None | Mild | Moderate | Severe | Extreme or cannot do |
| D3.2                                                                                                          | Getting <u>dressed</u> ?                                             | None | Mild | Moderate | Severe | Extreme or cannot do |
| D3.3                                                                                                          | <u>Eating</u> ?                                                      | None | Mild | Moderate | Severe | Extreme or cannot do |
| D3.4                                                                                                          | Staying <u>by himself or herself</u> for a <u>few days</u> ?         | None | Mild | Moderate | Severe | Extreme or cannot do |
| <b>Getting along with people</b>                                                                              |                                                                      |      |      |          |        |                      |
| D4.1                                                                                                          | <u>Dealing with people he or she does not know</u> ?                 | None | Mild | Moderate | Severe | Extreme or cannot do |
| D4.2                                                                                                          | <u>Maintaining a friendship</u> ?                                    | None | Mild | Moderate | Severe | Extreme or cannot do |
| D4.3                                                                                                          | <u>Getting along</u> with people who are <u>close</u> to him or her? | None | Mild | Moderate | Severe | Extreme or cannot do |
| D4.4                                                                                                          | <u>Making new friends</u> ?                                          | None | Mild | Moderate | Severe | Extreme or cannot do |
| D4.5                                                                                                          | <u>Sexual</u> activities?                                            | None | Mild | Moderate | Severe | Extreme or cannot do |
| <b>Life activities</b>                                                                                        |                                                                      |      |      |          |        |                      |
| D5.1                                                                                                          | Taking care of his or her <u>household responsibilities</u> ?        | None | Mild | Moderate | Severe | Extreme or cannot do |
| D5.2                                                                                                          | Doing his or her most important household tasks <u>well</u> ?        | None | Mild | Moderate | Severe | Extreme or cannot do |
| D5.3                                                                                                          | Getting all the household work <u>done</u> that is needed?           | None | Mild | Moderate | Severe | Extreme or cannot do |
| D5.4                                                                                                          | Getting the household work done as <u>quickly</u> as needed?         | None | Mild | Moderate | Severe | Extreme or cannot do |

If your relative works (paid, non-paid, self-employed) or goes to school, complete questions D5.5–D5.8, below. Otherwise, skip to D6.1 near the top of the following page.



# WHODAS 2.0

WORLD HEALTH ORGANIZATION  
DISABILITY ASSESSMENT SCHEDULE 2.0

36

Proxy

| In the past 30 days, <u>how much difficulty</u> did your relative have in: |                                                                 |      |      |          |        |                      |
|----------------------------------------------------------------------------|-----------------------------------------------------------------|------|------|----------|--------|----------------------|
| D5.5                                                                       | His or her day-to-day <u>work/school</u> ?                      | None | Mild | Moderate | Severe | Extreme or cannot do |
| D5.6                                                                       | Doing his or her most important work/school tasks <u>well</u> ? | None | Mild | Moderate | Severe | Extreme or cannot do |
| D5.7                                                                       | Getting all the work <u>done</u> that is needed?                | None | Mild | Moderate | Severe | Extreme or cannot do |
| D5.8                                                                       | Getting the work done as <u>quickly</u> as needed?              | None | Mild | Moderate | Severe | Extreme or cannot do |

| Participation in society in the <u>past 30 days</u> |                                                                                                                                                                                             |      |      |          |        |                      |
|-----------------------------------------------------|---------------------------------------------------------------------------------------------------------------------------------------------------------------------------------------------|------|------|----------|--------|----------------------|
| D6.1                                                | How much of a problem did <u>your relative</u> have in <u>joining in community activities</u> (for example, festivities, religious or other activities) in the same way as anyone else can? | None | Mild | Moderate | Severe | Extreme or cannot do |
| D6.2                                                | How much of a problem did your relative have because of <u>barriers or hindrances</u> in the world around him or her?                                                                       | None | Mild | Moderate | Severe | Extreme or cannot do |
| D6.3                                                | How much of a problem did your relative have <u>living with dignity</u> because of the attitudes and actions of others?                                                                     | None | Mild | Moderate | Severe | Extreme or cannot do |
| D6.4                                                | How much <u>time</u> did <u>your relative</u> spend on his or her health condition, or its consequences?                                                                                    | None | Mild | Moderate | Severe | Extreme or cannot do |
| D6.5                                                | How much has <u>your relative</u> been <u>emotionally affected</u> by his or her health condition?                                                                                          | None | Mild | Moderate | Severe | Extreme or cannot do |
| D6.6                                                | How much has his or her health been a <u>drain on his or her financial resources</u> or on the financial resources of other relatives?                                                      | None | Mild | Moderate | Severe | Extreme or cannot do |
| D6.7                                                | How much of a problem did <u>you</u> or the <u>rest of his or her family</u> have because of his or her health problems?                                                                    | None | Mild | Moderate | Severe | Extreme or cannot do |
| D6.8                                                | How much of a problem did your relative have in doing things <u>by himself or herself</u> for <u>relaxation or pleasure</u> ?                                                               | None | Mild | Moderate | Severe | Extreme or cannot do |

**Please continue to next page ...**



# WHODAS 2.0

WORLD HEALTH ORGANIZATION  
DISABILITY ASSESSMENT SCHEDULE 2.0

36

Proxy

|    |                                                                                                                                                                                                                             |                                   |
|----|-----------------------------------------------------------------------------------------------------------------------------------------------------------------------------------------------------------------------------|-----------------------------------|
| H1 | Overall, in the past 30 days, <u>how many days</u> were these difficulties present?                                                                                                                                         | <b>Record number of days</b> ____ |
| H2 | In the past 30 days, for how many days was your relative <u>totally unable</u> to carry out his or her usual activities or work because of any health condition?                                                            | <b>Record number of days</b> ____ |
| H3 | In the past 30 days, not counting the days that your relative was totally unable, for how many days did your relative <u>cut back</u> or <u>reduce</u> his or her usual activities or work because of any health condition? | <b>Record number of days</b> ____ |

This completes the questionnaire. Thank you for participating.
